# Supplementary material for: Housing Conditions, Neighbourhood Satisfaction and Suicide Mortality in Belgium: A Population-Based Cohort Study
Source: Research Square preprint supplement (doi:10.21203/rs.3.rs-8338834/v1), 2026-01-19
Supplement: Supplementary file 1 [file 33cca88aee282a30c737d03a.docx]

# Appendices

## Creation of the quality scores

Table A1 – List of the variables used to create the housing quality score and the weights given to them.

|  | Indicator | Coding | Category | Weight |
| --- | --- | --- | --- | --- |
| Layout of the housing | Type of building | 0 | Apartment, shared building | 1 |
|  | 1 | One-household house |
| Garden | 0 | Absence | 1 |
|  | 1 | Presence |
| Household density | 0 | Overcrowding (Less than one room per inhabitant) | 1 |
|  | 1 | No overcrowding (studio or over 1 room per inhabitant) |
| Basic items | Central heating | 0 | Absence | 2 |
|  | 1 | Presence |
| Bathroom | 0 | No bathroom | 2 |
|  | 1 | At least one bathroom within the housing |
| Outdoors items | Quality of the roof | 0 | Need for small or complete renovation | 1 |
|  | 1 | No need for renovation |
| Quality of the outside walls | 0 | Need for small or complete renovation | 1 |
|  | 1 | No need for renovation |
| Quality of the pipes | 0 | Need for small or complete renovation | 1 |
|  | 1 | No need for renovation |
| Indoor items | Quality of the inside walls | 0 | Need for small or complete renovation | 2 |
|  | 1 | No need for renovation |
| Quality of the electric system | 0 | Need for small or complete renovation | 2 |
|  | 1 | No need for renovation |
| Quality of the window | 0 | Need for small or complete renovation | 2 |
|  | 1 | No need for renovation |
| Double glazing | 0 | Absence | 2 |
|  | 1 | Presence |

Source: Census 2001.

Table A2 – List of the variables used to create the neighbourhood quality score and the weights given to them

|  | Indicator | Coding | Category | Weight |
| --- | --- | --- | --- | --- |
| Close amenities | Esthetic | 0 | Poorly satisfied | 2 |
|  | 1 | Satisfied or very satisfied |
| Cleanness | 0 | Poorly satisfied | 2 |
|  | 1 | Satisfied or very satisfied |
| Tranquillity | 0 | Poorly satisfied | 2 |
|  | 1 | Satisfied or very satisfied |
| Natural items | Air quality | 0 | Poorly satisfied | 2 |
|  | 1 | Satisfied or very satisfied |
| Green spaces | 0 | Poorly satisfied | 2 |
|  | 1 | Satisfied or very satisfied |
| Services | Healthcare services | 0 | Poorly satisfied | 1 |
|  | 1 | Satisfied or very satisfied |
| Administrative services | 0 | Poorly satisfied | 1 |
|  | 1 | Satisfied or very satisfied |
| Social services | 0 | Poorly satisfied | 1 |
|  | 1 | Satisfied or very satisfied |
| Culture and leisures | 0 | Poorly satisfied | 1 |
|  | 1 | Satisfied or very satisfied |

Source: Census 2001.

Table A3 – Principal component analysis conducted on the housing-related indicators, with eigenvalues and proportion of variance carried by each component.

| Variable | Comp1 | Comp2 | Comp3 | Comp4 | Comp5 | Comp6 | Comp7 | Comp8 | Comp9 | Comp10 | Comp11 | Unexplained |
| --- | --- | --- | --- | --- | --- | --- | --- | --- | --- | --- | --- | --- |
|  |  |  |  |  |  |  |  |  |  |  |  |  |
| Type of building | 0.1266 | 0.3401 | 0.3247 | 0.4079 | -0.1969 | -0.1323 | -0.1333 | -0.7197 | -0.052 | 0.0158 | 0.0399 | 0 |
| Overcrowding | 0.0374 | 0.13 | 0.1656 | 0.2865 | 0.9053 | 0.1854 | 0.125 | -0.0022 | 0.0465 | 0.0204 | 0.0095 | 0 |
| Central heating | 0.1655 | 0.3828 | 0.2272 | -0.4353 | 0.1143 | -0.2065 | -0.0659 | 0.0898 | -0.2606 | -0.6698 | 0.0183 | 0 |
| State of roof | 0.3584 | -0.4364 | 0.4035 | -0.0395 | -0.0325 | 0.0245 | 0.1158 | 0.0028 | -0.0379 | -0.0072 | 0.0144 | 0 |
| State of walls | 0.357 | 0.0107 | -0.1374 | 0.05 | 0.0468 | -0.0307 | -0.3695 | 0.0315 | 0.2554 | -0.048 | -0.8018 | 0 |
| Outdoor walls | 0.4219 | 0.0111 | -0.4057 | 0.0975 | 0.0305 | 0.0053 | 0.0628 | -0.0361 | -0.3541 | 0.0432 | 0.1195 | 0 |
| Pipes | 0.1967 | 0.3415 | 0.2077 | -0.3514 | 0.0832 | -0.3816 | -0.0297 | 0.1615 | -0.0146 | 0.7054 | 0.0272 | 0 |
| Windows | 0.4219 | 0.0111 | -0.4057 | 0.0975 | 0.0305 | 0.0053 | 0.0628 | -0.0361 | -0.3541 | 0.0432 | 0.1195 | 0 |
| Double glazing | 0.2213 | 0.272 | -0.1012 | -0.0624 | -0.1477 | 0.0477 | 0.7786 | -0.0669 | 0.4571 | -0.0899 | -0.1053 | 0 |
| Bathroom | 0.1015 | 0.2233 | 0.0963 | -0.3504 | -0.0984 | 0.8554 | -0.1463 | -0.1265 | -0.0676 | 0.1564 | 0.0029 | 0 |
| Garden | 0.0942 | 0.314 | 0.26 | 0.5357 | -0.2892 | 0.1534 | -0.001 | 0.6451 | -0.1189 | -0.0211 | 0.0015 | 0 |
| Electric system | 0.3285 | 0.0267 | -0.108 | 0.018 | 0.02 | -0.0117 | -0.4032 | 0.0871 | 0.6168 | -0.1182 | 0.5606 | 0 |
|  |  |  |  |  |  |  |  |  |  |  |  |  |
| Eigenvalue | 3.8365 | 1.51166 | 1.25163 | 1.1009 | 0.973365 | 0.930108 | 0.826534 | 0.728025 | 0.692678 | 0.648999 | 0.4996 | 0 |
| Share of variance | 29.51% | 11.63% | 9.63% | 8.47% | 7.49% | 7.15% | 6.36% | 5.60% | 5.33% | 4.99% | 3.84% | 0.00% |

Source : 2001 Census, National Register and death certificates (2002-2006). Calculations by the author.

Table A4 – Principal component analysis conducted on the neighbourhood-related indicators, with eigenvalues and proportion of variance carried by each component.

| Variable | Comp1 | Comp2 | Comp3 | Comp4 | Comp5 | Comp6 | Comp7 | Comp8 | Comp9 | Unexplained |
| --- | --- | --- | --- | --- | --- | --- | --- | --- | --- | --- |
|  |  |  |  |  |  |  |  |  |  |  |
| Esthetic aspect | 0.3261 | 0.3074 | -0.5858 | 0.0948 | 0.0111 | 0.0344 | 0.6359 | 0.0154 | -0.2027 | 0 |
| Air quality | 0.3345 | 0.3486 | 0.3514 | -0.3634 | -0.0408 | -0.0096 | -0.1688 | 0.2899 | -0.6299 | 0 |
| Cleanliness | 0.3463 | 0.3166 | -0.4795 | 0.0166 | -0.0763 | -0.0172 | -0.6919 | -0.0508 | 0.2493 | 0 |
| Quietness | 0.3285 | 0.3486 | 0.3985 | -0.3381 | -0.0359 | 0.0113 | 0.2766 | -0.2547 | 0.5955 | 0 |
| Green spaces | 0.3133 | 0.1594 | 0.3546 | 0.787 | 0.3518 | 0.0034 | -0.0461 | -0.0618 | -0.0406 | 0 |
| Healthcare services | 0.3148 | -0.381 | -0.0887 | -0.2248 | 0.5972 | 0.2069 | 0.0114 | 0.4988 | 0.2212 | 0 |
| Administrative services | 0.3426 | -0.3894 | 0.0115 | -0.0584 | -0.1406 | 0.6158 | -0.0567 | -0.526 | -0.2206 | 0 |
| Social services | 0.3379 | -0.3818 | -0.0378 | -0.1266 | 0.1245 | -0.755 | -0.0006 | -0.3447 | -0.1349 | 0 |
| Cultural services | 0.3537 | -0.3071 | 0.0971 | 0.2346 | -0.6895 | -0.0785 | 0.0802 | 0.4474 | 0.167 | 0 |
|  |  |  |  |  |  |  |  |  |  |  |
| Eigenvalue | 2.50494 | 1.87393 | 0.853526 | 0.823979 | 0.684237 | 0.598983 | 0.576513 | 0.542931 | 0.540959 |  |
| Share of variance | 0.2783 | 0.2082 | 0.0948 | 0.0916 | 0.076 | 0.0666 | 0.0641 | 0.0603 | 0.0601 |  |

Source : 2001 Census, National register and death certificates (2002-2006). Calculations by the author.

## Suicide by age

Figure A1 - Suicide rates of A/ men and B/ women for the general population and from extreme quartiles of housing quality

## Models without the group mean imputation

Table A5 – Cox model on the risk of suicide in 2002-2006 expressed in Hazards-ratio and 95% confidence intervals, without the group mean imputations of the missing values.

|  | Men | | | Women | | |
| --- | --- | --- | --- | --- | --- | --- |
|  | OR | *IC95%* | | OR | *IC95%* | |
| Housing quality (ref. Very high) |  |  |  |  |  |  |
| High | 1.011 | *0.923* | *1.107* | 0.903 | *0.779* | *1.048* |
| Low | 0.951 | *0.871* | *1.038* | 0.866 | *0.752* | *0.997* |
| Very low | 0.881 | *0.790* | *0.984* | 0.762 | *0.634* | *0.916* |
|  |  |  |  |  |  |  |
| Neighbourhood satisfaction (ref. High) | |  |  |  |  |  |
| Intermediate | 0.891 | *0.815* | *0.975* | 0.988 | *0.857* | *1.139* |
| Low | 1.023 | *0.947* | *1.105* | 1.012 | *0.891* | *1.150* |
|  |  |  |  |  |  |  |
| Age | 0.982 | *0.979* | *0.986* | 0.977 | *0.971* | *0.983* |
|  |  |  |  |  |  |  |
| Housing tenure (ref. Owner) |  |  |  |  |  |  |
| Tenant | 1.407 | *1.297* | *1.525* | 1.189 | *1.041* | *1.357* |
| Unknown | 1.659 | *1.224* | *2.248* | 1.312 | *0.756* | *2.277* |
|  |  |  |  |  |  |  |
| Household composition (ref. Marital couple, children) | | |  |  |  |  |
| Marital couple, no children | 0.820 | *0.736* | *0.915* | 1.398 | *1.174* | *1.666* |
| Non-marital couple, children | 1.302 | *1.110* | *1.527* | 0.800 | *0.545* | *1.175* |
| Non-marital couple, no children | 1.477 | *1.279* | *1.706* | 2.187 | *1.703* | *2.808* |
| Single, children | 1.503 | *1.289* | *1.753* | 2.297 | *1.908* | *2.766* |
| Single, no children | 2.388 | *2.181* | *2.614* | 3.211 | *2.707* | *3.809* |
| Other | 1.121 | *0.948* | *1.324* | 1.419 | *1.069* | *1.884* |
|  |  |  |  |  |  |  |
| Region (ref. Flanders) |  |  |  |  |  |  |
| Wallonia | 1.018 | *0.947* | *1.094* | 1.005 | *0.892* | *1.131* |
| Brussels | 0.826 | *0.728* | *0.937* | 0.816 | *0.663* | *1.006* |
|  |  |  |  |  |  |  |
| Area (ref. Urban) |  |  |  |  |  |  |
| Suburban | 1.193 | *1.094* | *1.301* | 0.879 | *0.763* | *1.012* |
| Rural | 1.093 | *0.996* | *1.199* | 0.887 | *0.762* | *1.033* |
|  |  |  |  |  |  |  |
| Citizenship (ref. Belgian) |  |  |  |  |  |  |
| Other European | 0.526 | *0.442* | *0.626* | 0.526 | *0.386* | *0.718* |
| Non-European | 0.293 | *0.179* | *0.481* | 0.583 | *0.318* | *1.069* |
| Unknown | 0.528 | *0.132* | *2.116* | 0.000 | *0.000* | *.* |
|  |  |  |  |  |  |  |
| Educational level (ref. Primary) |  |  |  |  |  |  |
| Lower Secondary | 1.118 | *0.999* | *1.252* | 1.088 | *0.903* | *1.310* |
| Upper Secondary | 0.955 | *0.849* | *1.073* | 1.285 | *1.062* | *1.555* |
| Higher | 0.741 | *0.653* | *0.841* | 1.329 | *1.087* | *1.624* |
| Unknown | 0.857 | *0.729* | *1.008* | 0.915 | *0.705* | *1.188* |
|  |  |  |  |  |  |  |
| Occupational status (ref. Unemployed) | |  |  |  |  |  |
| Inactive | 0.876 | *0.679* | *1.130* | 1.225 | *0.962* | *1.560* |
| Employed | 0.908 | *0.734* | *1.122* | 1.028 | *0.839* | *1.259* |
| Self-employed | 0.976 | *0.769* | *1.239* | 1.284 | *0.949* | *1.735* |
| Unknown | 1.068 | *0.847* | *1.347* | 0.830 | *0.619* | *1.113* |
|  |  |  |  |  |  |  |
| Time spent in the housing (ref. Under 1 year) | |  |  |  |  |  |
| 1-2 years | 0.819 | *0.729* | *0.919* | 0.801 | *0.661* | *0.971* |
| 3-5 years | 0.718 | *0.637* | *0.808* | 0.656 | *0.538* | *0.800* |
| 5 years+ | 0.672 | *0.605* | *0.747* | 0.654 | *0.549* | *0.778* |
|  |  |  |  |  |  |  |
| Subjective health (ref. Very good) | |  |  |  |  |  |
| Good | 1.313 | *1.197* | *1.440* | 1.712 | *1.433* | *2.044* |
| Intermediate | 2.104 | *1.885* | *2.347* | 3.633 | *2.989* | *4.415* |
| Bad | 3.618 | *3.147* | *4.158* | 8.715 | *6.997* | *10.854* |
| Very bad | 4.513 | *3.629* | *5.612* | 14.213 | *10.563* | *19.125* |
| Unknown | 1.613 | *1.257* | *2.071* | 2.792 | *1.914* | *4.073* |
|  |  |  |  |  |  |  |
| Deciles of BIMD (ref. most deprived) | |  |  |  |  |  |
| 2 | 1.085 | *0.962* | *1.225* | 1.049 | *0.858* | *1.281* |
| 3 | 1.105 | *0.957* | *1.276* | 1.186 | *0.934* | *1.508* |
| 4 | 1.063 | *0.929* | *1.215* | 1.378 | *1.113* | *1.706* |
| 5 | 0.957 | *0.829* | *1.105* | 1.376 | *1.098* | *1.723* |
| 6 | 0.994 | *0.855* | *1.155* | 1.255 | *0.983* | *1.603* |
| 7 | 0.883 | *0.756* | *1.030* | 1.192 | *0.932* | *1.524* |
| 8 | 0.994 | *0.852* | *1.159* | 1.248 | *0.968* | *1.609* |
| 9 | 0.981 | *0.839* | *1.147* | 1.224 | *0.947* | *1.582* |
| Least deprived | 0.973 | *0.822* | *1.151* | 1.121 | *0.846* | *1.487* |
|  |  |  |  |  |  |  |
| Failures | 3,622 |  |  | 1,348 |  |  |
| Observations | 2,279,672 |  |  | 2,282,802 |  |  |
| Log Likelihood | -51199.055 |  |  | -18890.578 |  |  |

Note: All individuals with at least three missing values in their neighbourhood or housing questions in the 2001 Census were excluded from analysis, about 9% compared to Table 2.

## Models on the healthy population

Table A6 – Cox proportional hazard model on the risk of suicide in 2002-2006 expressed in Hazard ratios (HR) and 95% confidence intervals on the population who declared being in good or very good health conditions in 2001.

|  | Men | | | Women | | |
| --- | --- | --- | --- | --- | --- | --- |
|  | HR | *IC95%* | | HR | *IC95%* | |
| Housing quality score (ref. Very low) | | |  |  |  |  |
| Low housing quality | 0.921 | *0.797* | *1.065* | 0.9 | *0.672* | *1.207* |
| High housing quality | 0.857 | *0.738* | *0.995* | 0.906 | *0.689* | *1.191* |
| Very high (Q4) | 0.799 | *0.679* | *0.941* | 0.768 | *0.577* | *0.997* |
|  |  |  |  |  |  |  |
| Neighbourhood quality score (ref. Low) | | |  |  |  |  |
| Intermediate | 0.922 | *0.757* | *1.13* | 0.985 | *0.648* | *1.499* |
| High | 0.836 | *0.719* | *0.971* | 0.92 | *0.699* | *1.21* |
|  |  |  |  |  |  |  |
| Age | 0.989 | *0.983* | *0.995* | 0.983 | *0.971* | *0.994* |
|  |  |  |  |  |  |  |
| Housing tenure (ref. Owner) |  |  |  |  |  |  |
| Tenant | 1.413 | *1.224* | *1.631* | 1.381 | *1.047* | *1.823* |
| Unknown | 0.977 | *0.437* | *2.183* | 0.648 | *0.091* | *4.622* |
|  |  |  |  |  |  |  |
|  |  |  |  |  |  |  |
| Marital couple, no children | 0.812 | *0.68* | *0.969* | 1.481 | *1.095* | *2.003* |
| Non-marital couple, children | 1.335 | *1.041* | *1.713* | 0.778 | *0.407* | *1.489* |
| Non-marital couple, no children | 1.285 | *0.984* | *1.677* | 2.4 | *1.505* | *3.829* |
| Single, children | 1.77 | *1.385* | *2.263* | 2.639 | *1.896* | *3.673* |
| Single, no children | 2.733 | *2.357* | *3.17* | 3.349 | *2.408* | *4.657* |
| Other | 1.33 | *1.032* | *1.713* | 1.766 | *1.102* | *2.833* |
|  |  |  |  |  |  |  |
| Region (ref. Flanders) |  |  |  |  |  |  |
| Wallonia | 0.967 | *0.863* | *1.084* | 1.023 | *0.829* | *1.262* |
| Brussels | 0.893 | *0.745* | *1.071* | 0.774 | *0.548* | *1.092* |
|  |  |  |  |  |  |  |
| Area (ref. Urban) |  |  |  |  |  |  |
| Suburban | 1.085 | *0.953* | *1.235* | 0.775 | *0.609* | *0.986* |
| Rural | 1.069 | *0.928* | *1.23* | 0.849 | *0.656* | *1.1* |
|  |  |  |  |  |  |  |
| Citizenship (ref. Belgian) |  |  |  |  |  |  |
| Other European | 0.609 | *0.457* | *0.812* | 0.592 | *0.324* | *1.083* |
| Non-European | 0.16 | *0.04* | *0.644* | 0.297 | *0.041* | *2.152* |
| Unknown | 0 | *0* | *.* | 0 | *.* | *.* |
|  |  |  |  |  |  |  |
| Educational level (ref. Primary) |  |  |  |  |  |  |
| Lower Secondary | 0.965 | *0.784* | *1.188* | 1.028 | *0.678* | *1.559* |
| Upper Secondary | 0.82 | *0.666* | *1.01* | 1.195 | *0.793* | *1.799* |
| Higher | 0.54 | *0.434* | *0.672* | 1.018 | *0.669* | *1.548* |
| Unknown | 1.027 | *0.758* | *1.392* | 0.826 | *0.415* | *1.645* |
|  |  |  |  |  |  |  |
| Occupational status (ref. Unemployed) | |  |  |  |  |  |
| Inactive | 0.661 | *0.374* | *1.169* | 1.014 | *0.595* | *1.728* |
| Employed | 0.699 | *0.455* | *1.074* | 0.857 | *0.583* | *1.259* |
| Self-employed | 0.67 | *0.422* | *1.063* | 1.184 | *0.705* | *1.987* |
| Unknown | 0.813 | *0.514* | *1.284* | 0.662 | *0.381* | *1.151* |
|  |  |  |  |  |  |  |
| Time spent in the housing (ref. Under 1 year) | |  |  |  |  |  |
| 1-2 years | 0.872 | *0.711* | *1.07* | 0.878 | *0.583* | *1.322* |
| 3-5 years | 0.786 | *0.641* | *0.965* | 0.777 | *0.518* | *1.167* |
| 5 years+ | 0.732 | *0.609* | *0.88* | 0.856 | *0.597* | *1.23* |
|  |  |  |  |  |  |  |
| Failures | 1369 |  |  | 398 |  |  |
| Observations | 1100556 |  |  | 1050632 |  |  |
| Log Likelihood | -18508.65 |  |  | -5381.803 |  |  |

## Models with competing risks

Table A7 – Fine-Gray subdistribution hazard model on the risk of suicide in 2002-2006 expressed in Hazards-ratio and 95% confidence intervals, with other causes of death as a competitive risk.

|  | Men | | | Women | | |
| --- | --- | --- | --- | --- | --- | --- |
|  | SHR | *IC95%* | | SHR | *IC95%* | |
| Housing quality (ref. Very high) |  |  |  |  |  |  |
| High | 0.975 | *0.933* | *1.015* | 0.937 | *0.803* | *1.055* |
| Low | 0.913 | *0.832* | *1.004* | 0.851 | *0.729* | *0.961* |
| Very low | 0.815 | *0.737* | *0.886* | 0.741 | *0.61* | *0.9* |
|  |  |  |  |  |  |  |
| Neighbourhood satisfaction (ref. Low) | |  |  |  |  |  |
| Intermediate | 0.942 | *0.861* | *1.042* | 0.997 | *0.907* | *1.096* |
| High | 0.897 | *0.822* | *0.977* | 0.958 | *0.837* | *1.099* |
|  |  |  |  |  |  |  |
| Age | 0.98 | *0.971* | *0.99* | 0.977 | *0.972* | *0.983* |
|  |  |  |  |  |  |  |
| Housing tenure (ref. Owner) |  |  |  |  |  |  |
| Tenant | 1.412 | *1.32* | *1.535* | 1.275 | *1.12* | *1.424* |
| Unknown | 1.375 | *1.141* | *1.568* | 1.496 | *1.078* | *1.82* |
|  |  |  |  |  |  |  |
| Household composition (ref. Marital couple, children) | | |  |  |  |  |
| Marital couple, no children | 1.039 | *0.92* | *1.174* | 1.773 | *1.454* | *2.162* |
| Non-marital couple, children | 1.177 | *1.013* | *1.367* | 0.736 | *0.507* | *1.069* |
| Non-marital couple, no children | 1.26 | *1.094* | *1.45* | 1.872 | *1.46* | *2.401* |
| Single, children | 1.416 | *1.217* | *1.648* | 1.552 | *1.282* | *1.878* |
| Single, no children | 1.937 | *1.671* | *2.245* | 3.271 | *2.423* | *4.417* |
| Other | 1.096 | *0.933* | *1.288* | 1.373 | *1.049* | *1.798* |
|  |  |  |  |  |  |  |
| Region (ref. Flanders) |  |  |  |  |  |  |
| Wallonia | 1.013 | *0.948* | *1.082* | 1.02 | *0.918* | *1.134* |
| Brussels | 0.786 | *0.702* | *0.879* | 0.766 | *0.643* | *0.912* |
|  |  |  |  |  |  |  |
| Area (ref. Urban) |  |  |  |  |  |  |
| Suburban | 1.156 | *1.073* | *1.245* | 0.886 | *0.786* | *0.998* |
| Rural | 1.105 | *1.018* | *1.198* | 0.912 | *0.801* | *1.038* |
|  |  |  |  |  |  |  |
| Citizenship (ref. Belgian) |  |  |  |  |  |  |
| Other European | 0.499 | *0.424* | *0.587* | 0.444 | *0.332* | *0.595* |
| Non-European | 0.232 | *0.147* | *0.366* | 0.425 | *0.243* | *0.744* |
| Unknown | 0.524 | *0.169* | *1.629* | 0 | *0* | *0* |
|  |  |  |  |  |  |  |
| Educational level (ref. Primary) |  |  |  |  |  |  |
| Lower Secondary | 1.027 | *0.925* | *1.14* | 0.997 | *0.847* | *1.173* |
| Upper Secondary | 0.902 | *0.807* | *1.007* | 1.127 | *0.954* | *1.332* |
| Higher | 0.706 | *0.622* | *0.803* | 1.203 | *1.001* | *1.447* |
| Unknown | 0.977 | *0.856* | *1.115* | 0.9 | *0.725* | *1.119* |
|  |  |  |  |  |  |  |
| Occupational status (ref. Unemployed) | |  |  |  |  |  |
| Inactive | 0.864 | *0.693* | *1.077* | 1.142 | *0.921* | *1.415* |
| Employed | 0.91 | *0.756* | *1.096* | 0.978 | *0.814* | *1.174* |
| Self-employed | 1.009 | *0.817* | *1.247* | 1.259 | *0.956* | *1.658* |
| Unknown | 1.034 | *0.844* | *1.267* | 0.849 | *0.659* | *1.094* |
|  |  |  |  |  |  |  |
| Time spent in the housing (ref. Under 1 year) | |  |  |  |  |  |
| 1-2 years | 0.895 | *0.815* | *1.016* | 0.834 | *0.7* | *0.999* |
| 3-5 years | 0.771 | *0.699* | *0.858* | 0.728 | *0.618* | *0.831* |
| 5 years+ | 0.681 | *0.63* | *0.798* | 0.651 | *0.535* | *0.78* |
|  |  |  |  |  |  |  |
| Subjective health (ref. Very good) |  |  |  |  |  |  |
| Good | 1.409 | *1.3* | *1.528* | 1.408 | *1.151* | *1.712* |
| Intermediate | 2.342 | *2.136* | *2.569* | 3.074 | *2.488* | *3.778* |
| Bad | 4.085 | *3.651* | *4.579* | 8.104 | *6.569* | *9.985* |
| Very bad | 4.71 | *3.914* | *5.679* | 13.739 | *10.525* | *17.957* |
| Unknown | 1.592 | *1.26* | *2* | 3.071 | *2.267* | *4.179* |
|  |  |  |  |  |  |  |
|  |  |  |  |  |  |  |
| Failures | 4,123 |  |  | 1,573 |  |  |
| Observations | 2,527,183 |  |  | 2,540,061 |  |  |
| Log Likelihood | -54670.33 |  |  | -21475.81 |  |  |

Table A8 – Fine-Gray subdistribution hazard model on the risk of suicide in 2002-2006 expressed in Hazards-ratio and 95% confidence intervals, with internal migration as a competitive risk.

|  | Men | | | Women | | |
| --- | --- | --- | --- | --- | --- | --- |
|  | SHR | *IC95%* | | SHR | *IC95%* | |
| Housing quality (ref. Very high) | | |  |  |  |  |
| High | 0.986 | *0.945* | *1.026* | 0.96 | *0.827* | *1.074* |
| Low | 0.934 | *0.854* | *1.028* | 0.772 | *0.65* | *0.885* |
| Very low | 0.861 | *0.789* | *0.931* | 0.718 | *0.584* | *0.877* |
|  |  |  |  |  |  |  |
| Neighbourhood satisfaction (ref. Low) | | |  |  |  |  |
| Intermediate | 0.994 | *0.913* | *1.098* | 0.99 | *0.935* | *1.05* |
| High | 0.922 | *0.877* | *0.992* | 1.001 | *0.885* | *1.142* |
|  |  |  |  |  |  |  |
| Age | 0.969 | *0.96* | *0.979* | 0.977 | *0.972* | *0.983* |
|  |  |  |  |  |  |  |
| Housing tenure (ref. Owner) | |  |  |  |  |  |
| Tenant | 1.287 | *1.194* | *1.409* | 1.36 | *1.205* | *1.509* |
| Unknown | 1.42 | *1.187* | *1.613* | 1.518 | *1.1* | *1.842* |
|  |  |  |  |  |  |  |
| Household composition (ref. Marital couple, children) | | |  |  |  |  |
| Marital couple, no children | 0.896 | *0.795* | *1.009* | 1.504 | *1.24* | *1.825* |
| Non-marital couple, children | 0.95 | *0.818* | *1.103* | 0.599 | *0.412* | *0.869* |
| Non-marital couple, no children | 0.972 | *0.846* | *1.117* | 1.422 | *1.114* | *1.815* |
| Single, children | 1.163 | *1.002* | *1.351* | 1.19 | *0.987* | *1.433* |
| Single, no children | 1.642 | *1.418* | *1.902* | 2.672 | *1.982* | *3.601* |
| Other | 0.937 | *0.798* | *1.1* | 1.118 | *0.855* | *1.463* |
|  |  |  |  |  |  |  |
| Region (ref. Flanders) | |  |  |  |  |  |
| Wallonia | 1.005 | *0.94* | *1.074* | 1.009 | *0.908* | *1.122* |
| Brussels | 0.778 | *0.696* | *0.871* | 0.758 | *0.637* | *0.903* |
|  |  |  |  |  |  |  |
| Area (ref. Urban) |  |  |  |  |  |  |
| Suburban | 1.171 | *1.088* | *1.261* | 0.882 | *0.783* | *0.994* |
| Rural | 1.12 | *1.033* | *1.215* | 0.907 | *0.797* | *1.032* |
|  |  |  |  |  |  |  |
| Citizenship (ref. Belgian) | |  |  |  |  |  |
| Other European | 0.455 | *0.387* | *0.536* | 0.403 | *0.301* | *0.541* |
| Non-European | 0.144 | *0.092* | *0.227* | 0.279 | *0.16* | *0.487* |
| Unknown | 0.304 | *0.098* | *0.945* | 0 | *0* | *0* |
|  |  |  |  |  |  |  |
| Educational level (ref. Primary) | | |  |  |  |  |
| Lower Secondary | 1.026 | *0.924* | *1.139* | 1 | *0.85* | *1.177* |
| Upper Secondary | 0.916 | *0.821* | *1.022* | 1.15 | *0.974* | *1.358* |
| Higher | 0.704 | *0.62* | *0.8* | 1.228 | *1.022* | *1.476* |
| Unknown | 0.968 | *0.848* | *1.104* | 0.903 | *0.727* | *1.122* |
|  |  |  |  |  |  |  |
| Occupational status (ref. Unemployed) | | |  |  |  |  |
| Inactive | 1.175 | *1.023* | *1.35* | 1.554 | *1.33* | *1.816* |
| Employed | 0.718 | *0.624* | *0.825* | 0.582 | *0.471* | *0.719* |
| Self-employed | 0.678 | *0.574* | *0.8* | 0.762 | *0.558* | *1.039* |
| Unknown | 0.73 | *0.642* | *0.83* | 0.654 | *0.539* | *0.794* |
|  |  |  |  |  |  |  |
| Time spent in the housing (ref. Under 1 year) | |  |  |  |  |  |
| 1-2 years | 0.894 | *0.803* | *0.996* | 0.922 | *0.774* | *1.099* |
| 3-5 years | 0.791 | *0.708* | *0.884* | 0.708 | *0.59* | *0.851* |
| 5 years+ | 1.437 | *1.313* | *1.572* | 1.417 | *1.226* | *1.638* |
|  |  |  |  |  |  |  |
| Subjective health (ref. Very good) | | |  |  |  |  |
| Good | 1.31 | *1.201* | *1.43* | 1.263 | *1.009* | *1.566* |
| Intermediate | 2.642 | *2.457* | *2.869* | 2.564 | *1.978* | *3.268* |
| Bad | 4.46 | *4.085* | *4.954* | 7.48 | *5.946* | *9.37* |
| Very bad | 5.167 | *4.371* | *6.136* | 12.894 | *9.679* | *17.112* |
| Unknown | 1.771 | *1.459* | *2.174* | 2.53 | *1.735* | *3.638* |
|  |  |  |  |  |  |  |
|  |  |  |  |  |  |  |
| Failures | 4,123 |  |  | 1,573 |  |  |
| Observations | 2,527,183 |  |  | 2,540,061 |  |  |
| Log Likelihood | -56060.59 |  |  | -21987.46 |  |  |
